# Supplementary material for: Scaling and accelerating knowledge interoperability for climate action through the Climate Connectivity Hub and Taxonomy
Source: Research Square preprint supplement (doi:10.21203/rs.3.rs-6347822/v1), 2025-05-14
Supplement: Supplementary file 1 [file 429ab965ef5e6a87cb53b4f6.docx]

# Supplementary material

**Table 1: Summary of the knowledge structures in the initial taxonomy mapping exercise (Source: Fochta et al., 2023).**

| **Terminology** | **Topic area(s)** | **Hierarchical/Flat**  **(Does it provide broader and narrower terms?**) | **Definitions/descriptions provided** | **Complementarity with IPCC AR6 Glossary** | **Limitations** |
| --- | --- | --- | --- | --- | --- |
| GEMET taxonomy | Environment | Hierarchical | Yes | Greater breadth of terms. | No sources provided for definitions, thus challenging to assess credibility and robustness. |
| Water Adaptation Technology (UNEP-DHI) | Water; Climate Change Adaptation | Hierarchical | Yes | Provides further insight into water-related adaptation activities and ecosystems, expanding on the IPCC glossary. | Some terms are too specific – might need disaggregating.    Some definitions are more descriptive.    No methodology provided for how the taxonomy was developed. |
| UNDRR-ISC hazard definition and classification | Hazards; Disaster Risk; Climate Change | Hierarchical | Yes | Provides further insight into hazards (climatic, biological etc.), and includes scope notes and alternative names for terms. | Some hazards included in the taxonomy are less relevant to climate change e.g. chemical or extra-terrestrial. |
| City Climate Hazard Taxonomy (C40 and ARUP) | Hazards; Climate Change | Hierarchical | No | Provides insight into the semantic relationships between hazards. | No definitions provided. |
| Climate Adaptation Project and Risk Operational Taxonomy (Boutang *et al.,*2020) | Environment; Climate Change Adaptation | Hierarchical | No | Provides insight into keywords that describe or are relevant to existing adaptation projects. | No definitions provided.    The relationships depicted between terms switch between broader/narrower (e.g. flood protection -> drainage system) and related (water management -> epidemic disease). |
| TNA Adaptation taxonomy (GTC and UNEP) | Climate Change Adaptation; Technologies | Hierarchical | Yes | Offers a technological perspective which may benefit scope notes. | Terms may need to be disaggregated.    Definitions are very technology focused so may not be relevant or applicable to wider audiences/projects. |
| Climate-ADAPT tags | Climate Change Adaptation | Flat | No | Provides insight into how climate change knowledge can be organised (e.g. into different types of adaptation sectors). | Semantic relationships not provided. |
| EU Taxonomy | Climate Change Adaptation; Climate Change Mitigation; Policy; Finance | Flat | Yes | Offers a perspective on economic activities and EU regulations, and details how stakeholders can comply with climate change adaptation and mitigation policies. | 'Definitions' are EU-specific and less focused on the semantic nature of terms. |
| Myriad-EU glossary | Disaster Risk; Climate Change Adaptation; Research Methods | Flat | Yes | Provides further insight into disaster risk and hazards; as well as different research methods and approaches. | Only provides related terms, and this is not consistent across concepts. |
| Key Types of Measures for Adaptation (ETC/CCA) | Climate Change Adaptation; Policy; Finance | Hierarchical | No | The 'adaptation option' categories align with those in AR5, but the classification highlights their use in describing actions and programmes of measures for adaptation in an EU context. | No definitions provided for what constitutes a particular adaptation action. |
| RESIN Glossary | Climate Change Adaptation; Urban Resilience; Cities | Flat | Yes | Provides further insight into urban resilience and infrastructure-related terms. | Only provides related terms |
| CTCN Taxonomy | Climate Change Adaptation; Climate Change Mitigation | Hierarchical | No | Highlights and organises climate adaptation and mitigation activities into different sectors, depicting broader and narrower terms. | No definitions provided.    Some terms are very specific, and thus may increase risk of redundancy. |
| CDRI Lexicon | Disaster Risk; Urban Resilience | Flat | Yes (in consultation) | Provides further insight into disaster risk- and infrastructure-related terms; alongside scope notes that highlight important stakeholders and contextual use of terms. | Only provides related terms, and this is not consistent across concepts.    Definitions are infrastructure- and disaster risk-focused; thus, may lose relevance in different contexts. |
| UNICEF Research Taxonomy | Research Methods | Hierarchical | Yes | Provides further insight into research methods and designs. | Related terms not provided. |

**List of the knowledge structures being considered for integration into the MAIA taxonomy (as of April 2025):**

- [Society for Risk Analysis glossary](https://www.sra.org/wp-content/uploads/2020/04/SRA-Glossary-FINAL.pdf)
- [Orientation guide on concepts, terms and definitions in the context of Climate Services, Infrastructure Risk Assessment and Climate Risk Management – GIZ](https://weadapt.org/wp-content/uploads/2023/05/glossary_climate-services-infrastructure-risk.pdf)
- [City Climate Hazard Taxonomy - C40](https://www.c40.org/wp-content/static/researches/images/33_C40_Arup_Climate_Hazard_Typology.original.pdf?1426352208)
- [MYRIAD-EU glossary](https://disasterriskgateway.net/index.php/Definitions)
- [CDRI Lexicon](https://lexicon.cdri.world/)
- [GEMET](https://www.eea.europa.eu/help/glossary/gemet-environmental-thesaurus)
- [Climate Change Adaptation Technologies for Water – UNEP-DHI](https://www.unepdhi.org/wp-content/uploads/sites/2/2020/05/CC_Adaptation_technologies_for_water_red.pdf%20(go%20to%20page%2021-))
- [Taxonomy of Climate Change Adaptation Technology – UNEP-DTU](https://tech-action.unepccc.org/wp-content/uploads/sites/2/2021/04/report-on-taxonomy-of-climate-change-adaptation-technology-including-factsheets-finalbrief-tna-adaptation-taxonomy.pdf)
- [RESIN glossary](https://ec.europa.eu/research/participants/documents/downloadPublic?documentIds=080166e5a5bef06e&appId=PPGMS)
- [CTCN Technology Taxonomy](https://www.ctc-n.org/sites/www.ctc-n.org/files/resources/CTCN%20Technology%20Taxonomy.pdf)
- [UNICEF Research Taxonomy](https://www.unicef.cn/media/25521/file/Annex_2_-_2022_UNICEF_Booklet_for_RSE_EN.pdf)
- [BBC Climate Change Glossary](https://www.bbc.co.uk/news/science-environment-11833685)
- [Climate Finance Glossary – Urban-LEDS project](https://e-lib.iclei.org/wp-content/uploads/2019/12/Climate%20finance%20glossary.pdf)

In addition, sets of terms are being collated to create knowledge structures for specialised areas such as climate services.

**Table 2: Matrix used to collate and map meta-data for and across knowledge structures (source: authors).**

|  | Concept 1 | Concept 2 | Concept 3 |
| --- | --- | --- | --- |
| Definition/perspective |  |  |  |
| Alternative labels/synonyms |  |  |  |
| Broader term(s) |  |  |  |
| Narrower term(s) |  |  |  |
| Related term(s) |  |  |  |
| Scope notes |  |  |  |
| Comments (links to IPCC) |  |  |  |
| IPCC definition (if different) |  |  |  |
| Source |  |  |  |
| Added to MAIA taxonomy |  |  |  |
